# Supplementary material for: Photocatalytic activity of transition-metal-ion-doped coordination polymer (CP): photoresponse region extension and quantum yields enhancement via doping of transition metal ions into the framework of CPs
Source: Royal Society of Chemistry journal article supplement (doi:10.1039/c4dt00435c), 2014-01-01
Supplement: c4dt00435c1.pdf [file c4dt00435c1.pdf]

1                           **Electronic Supplementary Information (ESI)**  
2 **Photocatalytic Activity of Transition-Metal-Ion-Doped Coordination**  
3 **Polymer (CP): Photoresponse Region Extension and Quantum Yields**  
4 **Enhancement via the Doping of Transition Metal Ion into the**  
5 **Framework of CPs**

6 **Xin-Xin Xu\***, Zhong-Ping Cui, Xin Gao and Xiao-Xia Liu

7 *Department of Chemistry, College of Science, Northeast University, Shenyang,*  
8 *Liaoning, 110819, People's Republic of China*

9

10

11

12

13

14

15

16

17

18

19

20

21

22

1

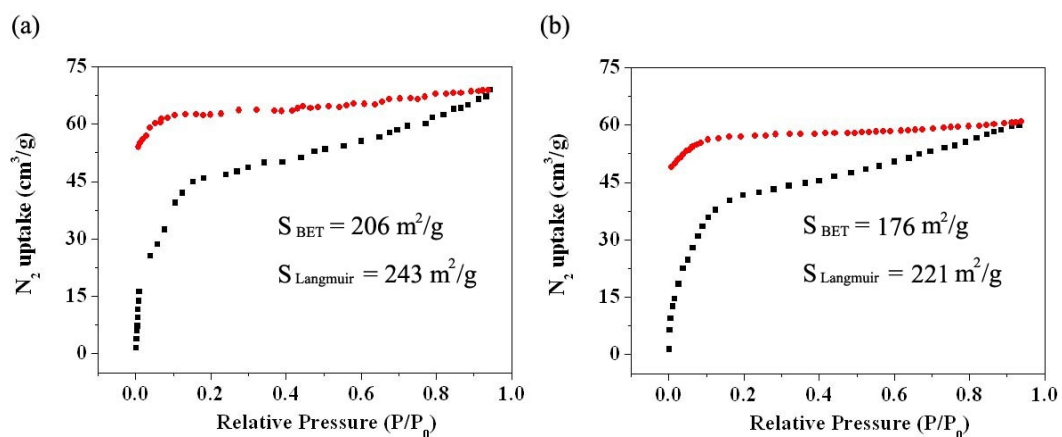

2

3 Figure S1  $\text{N}_2$  gas-sorption measured at 77 K, (a) **CP1**; (b)  **$\text{Fe}^{3+}/\text{CP1}$** . (The black

4 blocks and red circles represent adsorption and desorption branches, respectively)

5

6

7

8

9

10

11

12

13

14

15

16

17

1

2

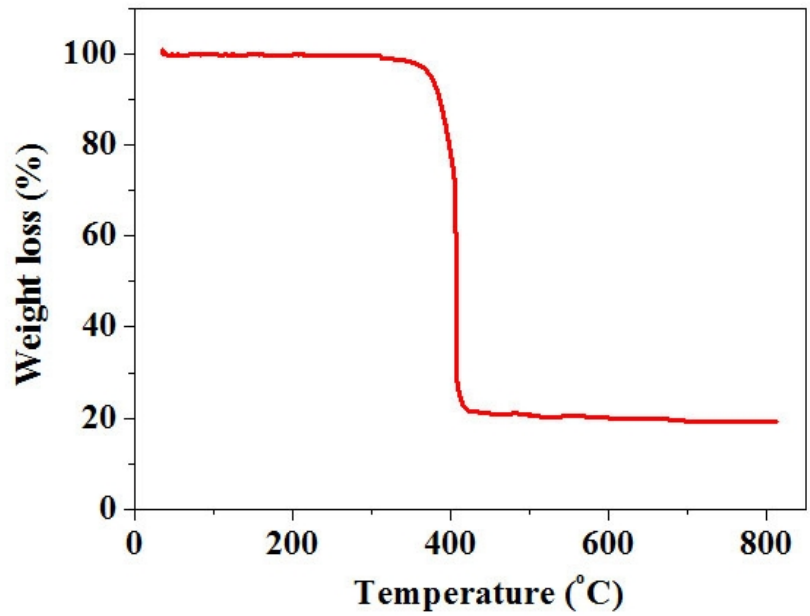

3

4

Figure S2 TGA of CP1

5

6

7

8

9

10

11

12

13

14

15

1

2

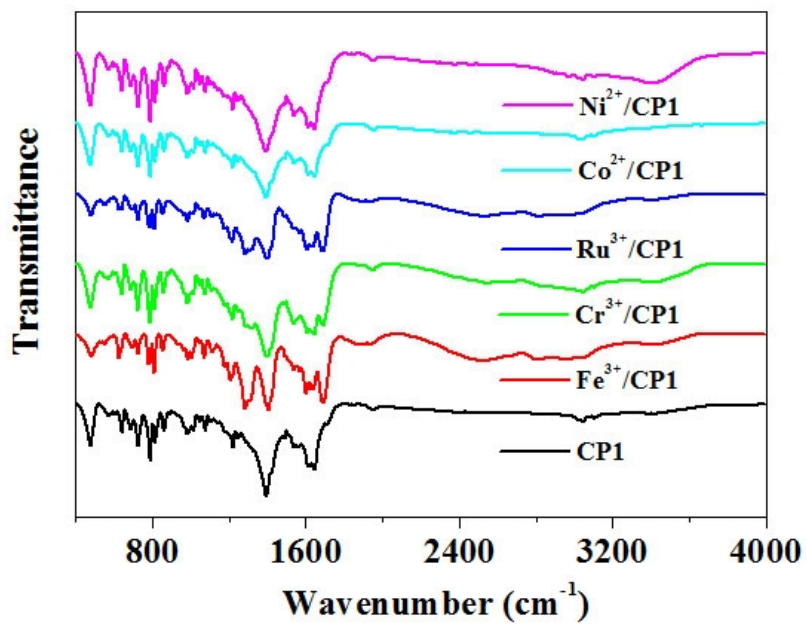

3

4 Figure S3 IR spectra of CP1, Fe<sup>3+</sup>/CP1, Cr<sup>3+</sup>/CP1, Ru<sup>3+</sup>/CP1, Co<sup>2+</sup>/CP1 and  
5 Ni<sup>2+</sup>/CP1.

6

7

8

9

10

11

12

13

14

15

1

2

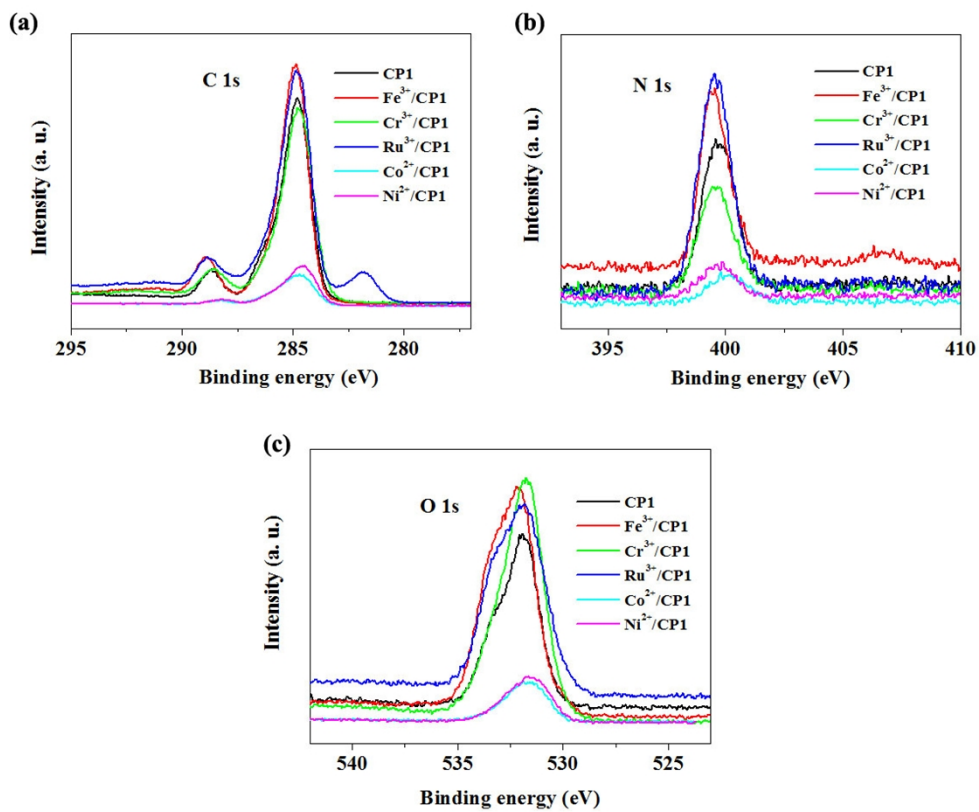

3

4 Figure S4 XPS spectrum of C, N and O elements in **CP1** and **TMI/CP1**: (a) C1s; (b)

5 N1s; (c) O1s.

6

7

8

9

10

11

12

1

2

3

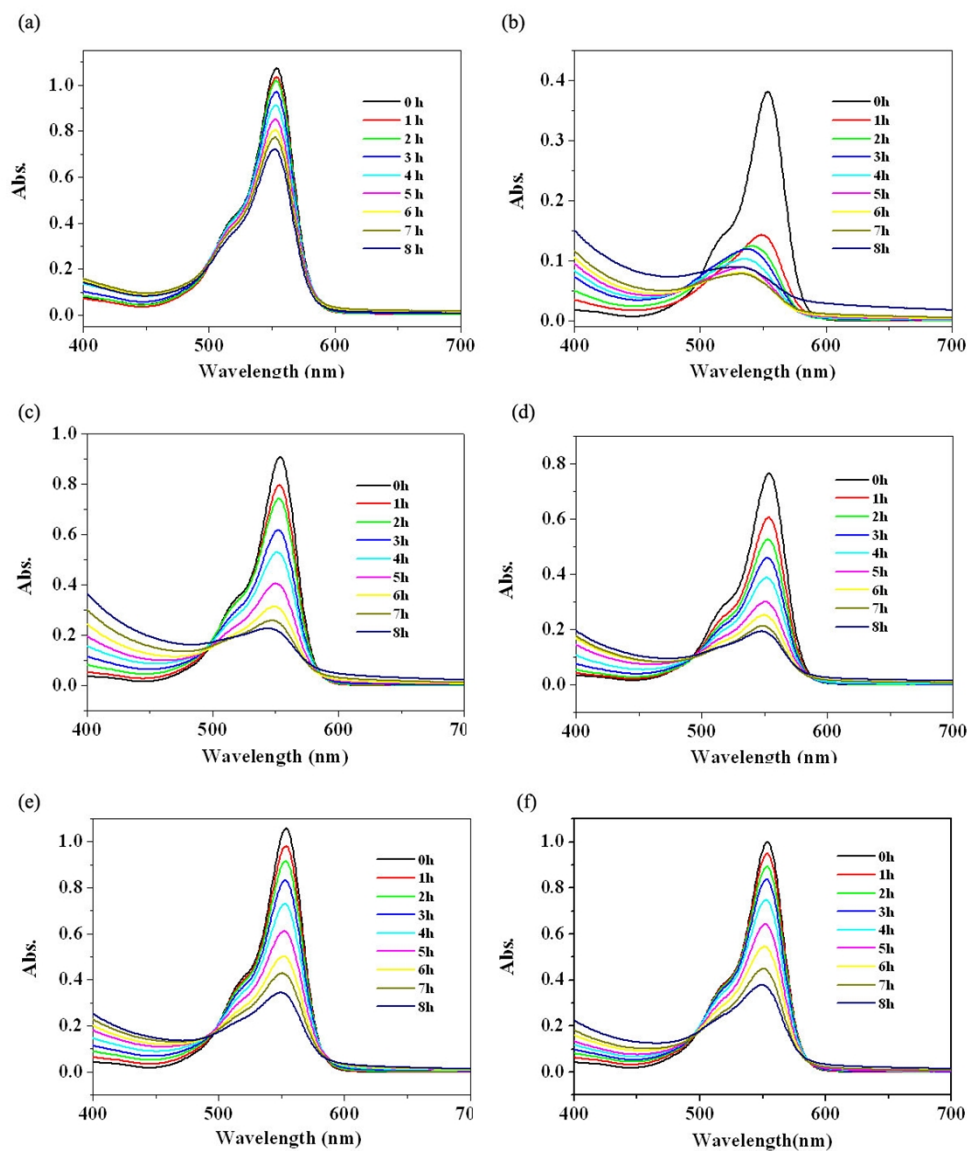

4

5 Figure S5 Absorption spectra of RhB degraded with different photocatalysts under  
6 irradiation of ultraviolet light (a) CP1, (b) Fe<sup>3+</sup>/CP1, (c) Cr<sup>3+</sup>/CP1, (d) Ru<sup>3+</sup>/CP1, (e)  
7 Co<sup>2+</sup>/CP1 and (f) Ni<sup>2+</sup>/CP1.

8

1

2

3

4

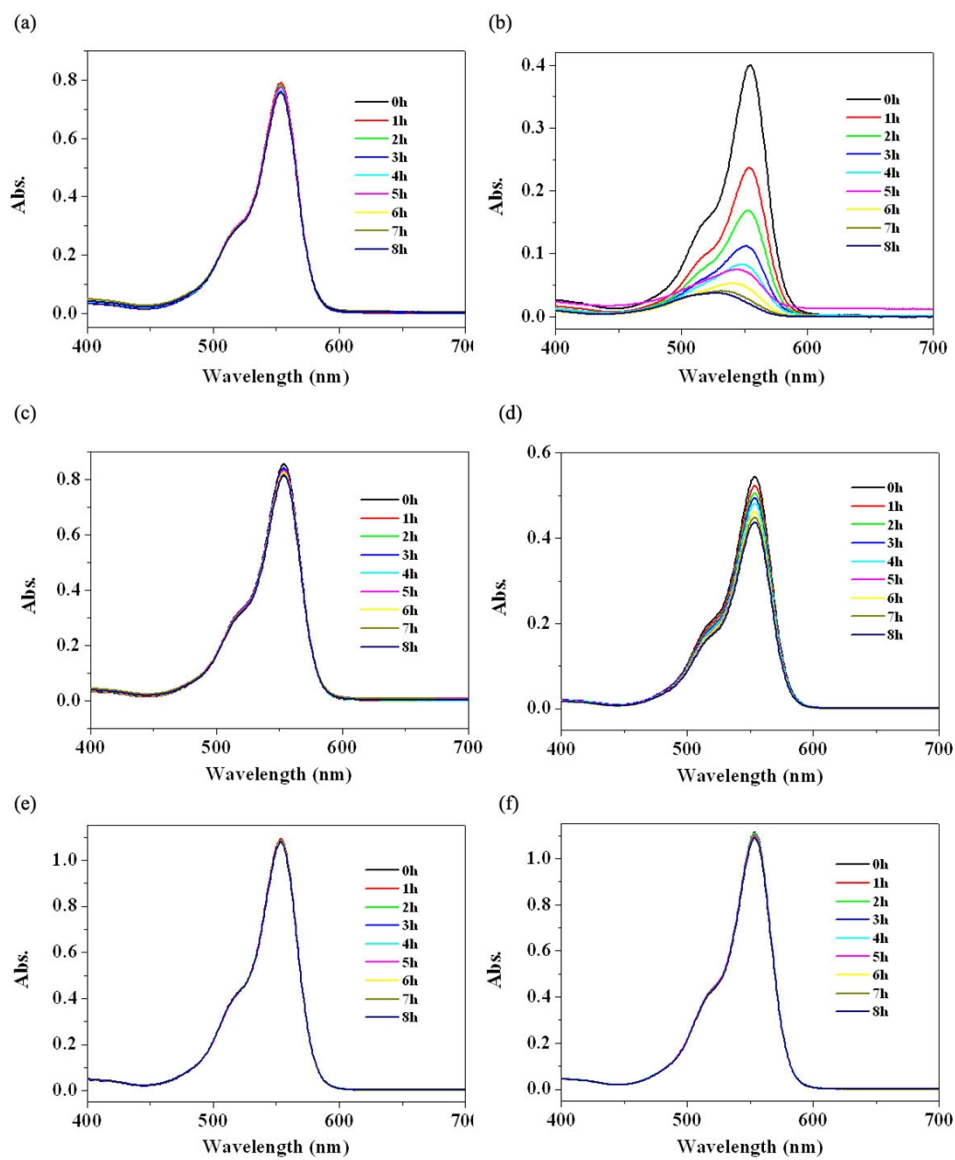

5

6 Figure S6 Absorption spectra of RhB degraded with different photocatalysts under

7 irradiation of visible light (a) **CP1**, (b) **Fe<sup>3+</sup>/CP1**, (c) **Cr<sup>3+</sup>/CP1**, (d) **Ru<sup>3+</sup>/CP1**, (e)

8 **Co<sup>2+</sup>/CP1** and (f) **Ni<sup>2+</sup>/CP1**.

1

2

3

4

5

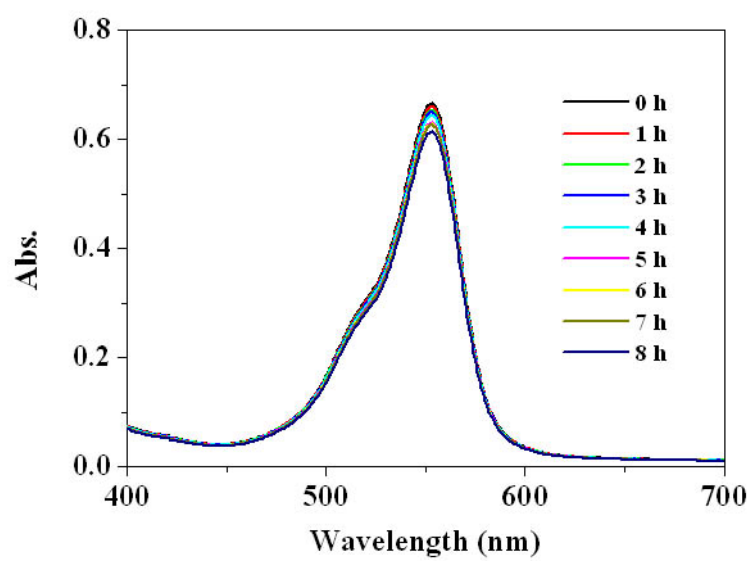

6

7 Figure S7 Absorption spectra of RhB degraded with  $\text{Fe}(\text{NO}_3)_3 \cdot 6\text{H}_2\text{O}$  under irradiation

8 of visible light.

9
